# Supplementary material for: Inter-correlation of impurity trace elements in bloodstone rock: X-ray fluorescence mapping studies
Source: Royal Society of Chemistry journal article supplement (doi:10.1039/b909667a), 2009-01-01
Supplement: b909667a.pdf [file b909667a.pdf]

## Electronic supplementary information on JAAS-B909667A

### Inter-correlation of impurity trace elements in bloodstone rock: X-ray fluorescence mapping studies

Yan-ping Zhang and Kenji Sakurai

#### S1. Quantitative analysis method

For determination of the distribution of elemental concentrations, the method basically same as Lachance-Traill algorithm [1] which has been successfully applied in material analysis [2, 3] was used to perform quantitative analysis. In the analytical process, the following three assumptions are used. The first is that the main chemical compositions are fixed at each scanning point and each point is considered as a flat, homogeneous and thick specimen. The second assumption is that beam intensity changes slowly during the entire scan and secondary fluorescence is neglected because of the low concentration of elements with higher atomic numbers and that the fluorescent element is associated with pure absorbers only. The third is that the composition of sample matrix is expressed as function of two components  $x\text{Fe}$  and  $(1-x)\text{SiO}_2$  where  $x$  is Fe concentration. Because Fe chemical states are different in different region of bloodstone, here we do not assume  $\text{Fe}_2\text{O}_3$  and  $\text{SiO}_2$  but Fe and  $\text{SiO}_2$  as main components. Figure S1 gives a simple flow-chart of the quantitative analysis. According to assumptions mentioned above, the element fluorescence at each scanning point can be given by

$$p_i = qE_i C_i \int_{\lambda_0}^{\lambda_{abs,i}} \frac{\mu_{i,\lambda} I_\lambda d\lambda}{\mu_{s,\lambda} + \frac{\sin \psi_1}{\sin \psi_2} \mu_{s,\lambda_i}} \quad (1)$$

Where,  $p_i$  and  $E_i$ , are the integrated fluorescence intensity and excitation factor of the considered X-ray line for element  $i$ , respectively.  $C_i$  and  $I_\lambda$  are the concentration of element  $i$  and intensity of incidence X-ray.  $\mu_{i,\lambda}$ ,  $\mu_{s,\lambda}$  and  $\mu_{s,\lambda_i}$  are the absorption coefficient of element  $i$  for the incidence X-ray, the sample's main components for the incidence X-ray and the considered X-ray line for element  $i$ , respectively.  $q$  is defined as  $q = \frac{\sin \psi_1}{\sin \psi_2} \times \frac{d\Omega}{4\pi}$  where  $\Psi_1$ ,  $\Psi_2$  and  $d\Omega$  are the incidence angle, emergence angle and solid angle represented by the detector. Due to monochromic incidence X-rays in the synchrotron radiation facility, the equation described above can be reduced to

$$p_i = qE_i C_i \frac{\mu_{i,\lambda} I_\lambda}{\mu_{s,\lambda} + \frac{\sin \psi_1}{\sin \psi_2} \mu_{s,\lambda_i}} \quad (2)$$

Both standard samples and bloodstone are measured under the same experimental conditions (the incidence and emergence angle are  $45^\circ$ ). So the intensity ratio of bloodstone and the standard samples for element  $i$  can be given by

$$\frac{p_{ST}^i / I_{\lambda_{in}}^i}{p_{BS}^i / I_{\lambda_{in}}^i} = \frac{C_{ST}^i (\mu_{BS}^{\lambda_{in}} + \mu_{BS}^{\lambda_i})}{C_{BS}^i (\mu_{ST}^{\lambda_{in}} + \mu_{ST}^{\lambda_i})} \quad (3)$$

Where  $p_{ST}^i$ , and  $p_{BS}^i$  are the measured intensity for element  $i$   $K_\alpha$  in a standard sample and bloodstone, respectively and  $C_{ST}^i$  and  $C_{BS}^i$  are the concentrations of the corresponding element in a standard sample and bloodstone, respectively.  $\mu_{BS}^{\lambda_{in}}$ ,  $\mu_{BS}^{\lambda_i}$ ,  $\mu_{ST}^{\lambda_{in}}$  and  $\mu_{ST}^{\lambda_i}$  are the absorption coefficients of the standard samples and bloodstone for the incidence X-ray and the element  $i$ 's  $K_\alpha$ . Table 1 shows the standard samples' major components, elemental concentration, absorption coefficient and measured integrated intensity for  $K_\alpha$  of Rb, Sr in NIST 612 and Fe, Cu, and Zn in Glass beads. For NIST SRM 612, the major

components and elemental concentration are derived from the certificate of NIST standard reference material. For Glass beads, the major components and elemental concentration are given by producer. The absorption coefficient is calculated from NIST physical reference data and 4 digital numbers were remained. Table 2 gives the calculated absorption coefficients for  $K_{\alpha}$  of Fe, Cu, Zn, Rb, Sr and incidence X-ray with 19.5 keV in bloodstone in terms of concentration of Fe and  $\text{SiO}_2$  where their values are defined as  $x$  and  $1-x$ . For absorption coefficients, 2 digital numbers after point were remained. After putting the data given by Tables 1 and 2 into Equation (3), the relationship between elemental concentration and measured corresponding element  $K_{\alpha}$  intensity in unknown bloodstone can be obtained by a simple calculation. The relationships between concentration and intensity for Fe, Cu, Zn, Rb, Sr in bloodstone are given by equations (4-8), respectively.

$$c_{Fe}^m (\%) = 4.879 / (8.65 \times 10^7 / p_{Fe}^m - 1.648) \quad (4)$$

$$c_{Cu}^m (ppm) = 1.024 \times 10^{-4} (37.17 + 292.8 c_{Fe}^m) p_{Cu}^m \quad (5)$$

$$c_{Zn}^m (ppm) = 7.8 \times 10^{-5} (32.18 + 257.52 c_{Fe}^m) p_{Zn}^m \quad (6)$$

$$c_{Rb}^m (ppm) = 2.40 \times 10^{-4} (12.326 + 109.52 c_{Fe}^m) p_{Rb}^m \quad (7)$$

$$c_{Sr}^m (ppm) = 2.53 \times 10^{-4} (10.4 + 48.89 c_{Fe}^m) p_{Sr}^m \quad (8)$$

In equations (4-8),  $c$  and  $p$  are the concentration and measured integrated intensity for  $K_{\alpha}$  of specific elements and the constants represent the product of the ratio of elemental concentration and measured corresponding elemental  $K_{\alpha}$  intensity in a standard sample and the ratio of absorption coefficients for bloodstone and a standard sample. By using equations (4-8), the concentration of Fe, Cu, Zn, Rb and Sr in the desired region of bloodstone can be obtained. The errors of elemental concentration are mainly from statistical errors and are estimated to be less than 3.7% for Fe concentrations.

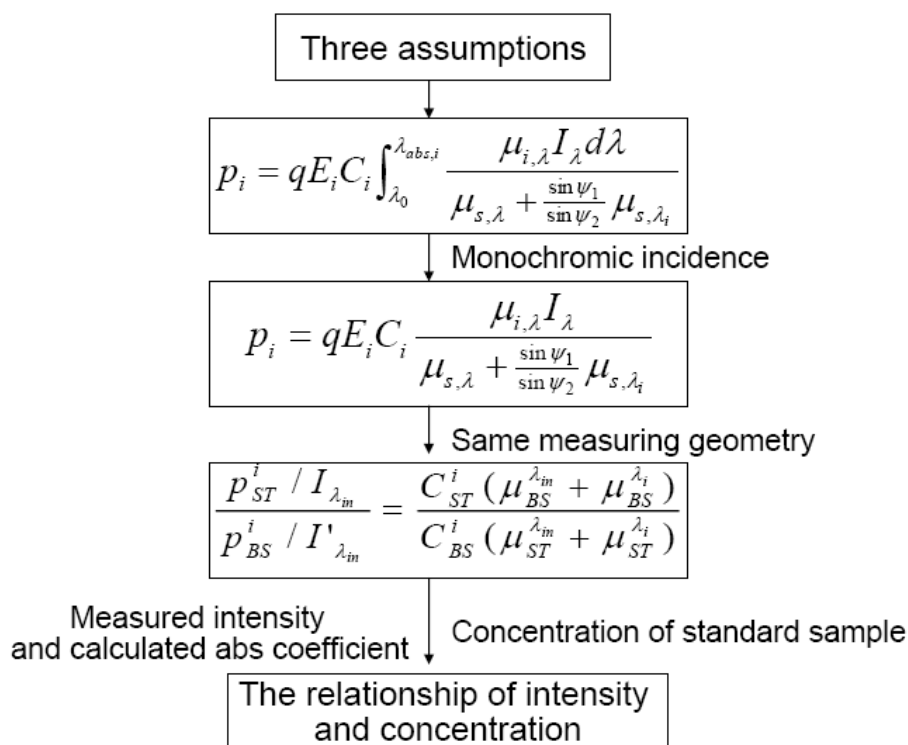

Figure S1 A flow-chart of the quantitative analysis.

Table 1 the major components, elemental concentration, absorption coefficient and measured integrated intensity for  $K_{\alpha}$  of Rb, Sr, Fe, Cu and Zn in standard samples. NIST 612 sample's major components and elemental concentration are obtained from the certificate of NIST standard reference material. The Glass sample's major components and elemental concentration are given by producer. Absorption coefficients are derived from NIST physical reference data. The corresponding element's  $K_{\alpha}$  intensity is the experimental value.

| Standard sample | Major components                                                                                      | Element i | Concentration for element i | Absorption coefficient for $K_{\alpha}$ of element i | Intensity for $K_{\alpha}$ of element i |
|-----------------|-------------------------------------------------------------------------------------------------------|-----------|-----------------------------|------------------------------------------------------|-----------------------------------------|
| NIST 612        | SiO <sub>2</sub> (72%)<br>CaO (12%)<br>Na <sub>2</sub> O (14%)<br>Al <sub>2</sub> O <sub>3</sub> (2%) | Rb        | 31.4 ppm                    | 12.79                                                | 970/300s                                |
|                 |                                                                                                       | Sr        | 45.8 ppm                    | 10.24                                                | 1585/300s                               |
| Glass A         | Li <sub>4</sub> B <sub>7</sub> (90%)                                                                  | Fe        | 100 ppm                     | 12.08                                                | 1056/300s                               |
| Glass B         | LiCo <sub>3</sub> (9.5%)                                                                              | Cu        | 100 ppm                     | 31.62                                                | 3405/300s                               |
| Glass C         | KBr (0.5%)                                                                                            | Zn        | 100 ppm                     | 27.46                                                | 50780/300s                              |

Table 2 the bloodstone's absorption coefficient for  $K_{\alpha}$  of Fe, Cu, Zn, Rb, Sr and incidence X-ray with 19.5 keV which are given in terms of the concentration of the sample's main components (Fe and SiO<sub>2</sub> are x and 1-x, respectively)

| Energy                 | Fe $K_{\alpha}$ | Cu $K_{\alpha}$   | Zn $K_{\alpha}$   | Rb $K_{\alpha}$  | Sr $K_{\alpha}$ | 19.5 keV        |
|------------------------|-----------------|-------------------|-------------------|------------------|-----------------|-----------------|
| Absorption coefficient | 73.98-<br>0.53x | 36.04+<br>266.86x | 30.82+<br>231.58x | 10.05+<br>83.58x | 8.01+<br>22.95x | 2.88+<br>25.94x |

### Reference

1. G. R. Lachance and R. J. Trail, Can. J. Spec. 1966, 11, 43.
2. R. K. Srivastava, R. Chandra and A. Shastri, Proc. Indian. Acad. Sci. (Earth Planet. Sci), 2004, 113, 605.
3. V. A. Zartsev, T. A. Makarova, A.V. Bakhtiarov and L. N. Moskvina, Inorganic Materials, 2008, 14, 1559.

## S2. X-ray fluorescence mapping

In the main text, X-ray fluorescence mapping on the bloodstone was discussed in detail. The followings are full color versions of Figures 3, 4 and 5.

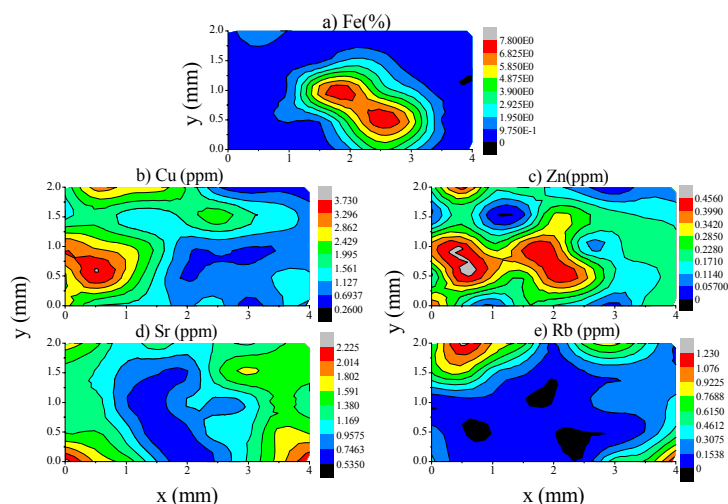

**Figure S2**

The distributions of Fe, Cu, Zn, Sr and Rb concentration transformed from integrated intensity of the XRF spectra for the region of interest of the bloodstone by using equation (1), where the unit is % for Fe and ppm for other elements. Fe  $K\alpha$  integrated intensity included the correction of sum peak when Fe intensity was high enough and Rb  $K\alpha$  integrated intensity was obtained from the sum peak of Rb  $K\alpha$  and Br  $K\beta$  by removing Br  $K\beta$  which is calculated by the ratio of Br  $K\alpha$  to Br  $K\beta$  when Br appeared (Full color version of Figure 3).

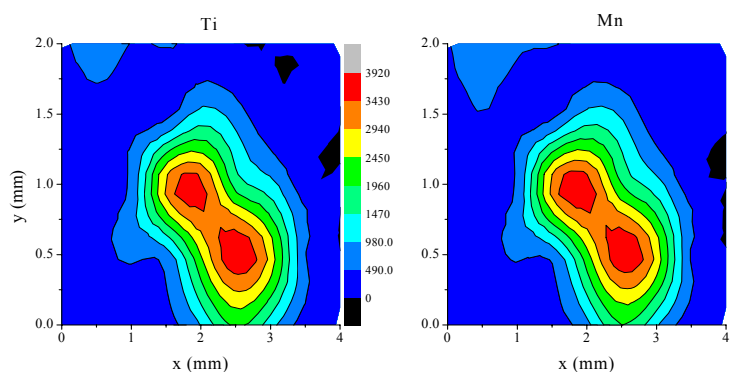

**Figure S3**

The distributions for  $K\alpha$  integrated intensity of Ti and Mn from XRF spectra corresponding to the region of interest of the bloodstone. The Mn integrated intensity is not net intensity but gross intensity because of high Fe  $K\alpha$  intensity (Full color version of Figure 4).

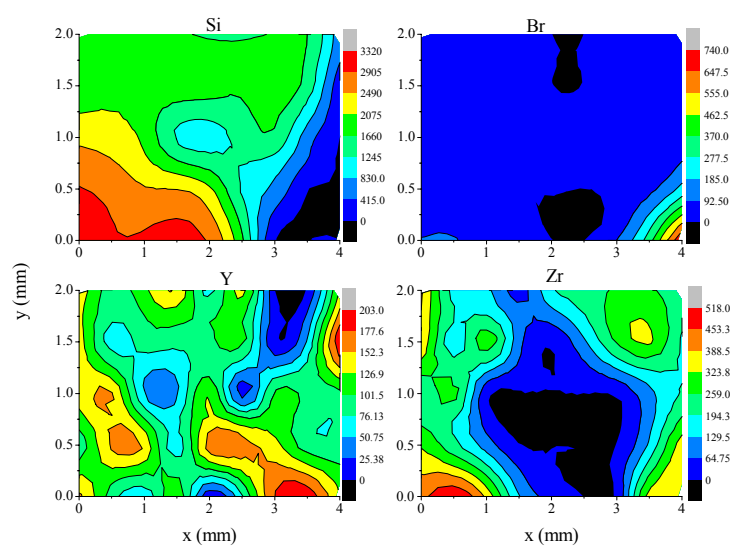

**Figure S3**

The distributions for  $K_{\alpha}$  integrated intensity of Si, Br, Y and Zr from XRF spectra corresponding to the region of interest of the bloodstone. The integrated intensities of Y and Zr are obtained from the sum peak by removing Rb  $K\beta$  and Sr  $K\beta$ , respectively (Full color version of Figure 5).
